# Supplementary material for: Space charge enhanced ion transport in heterogeneous polyelectrolyte/alumina nanochannel membranes for high-performance osmotic energy conversion
Source: Royal Society of Chemistry journal article supplement (doi:10.1039/d1ta08560c), 2021-12-10
Supplement: d1ta08560c1.pdf [file d1ta08560c1.pdf]

**Electronic Supplementary Information (ESI)**

**Space Charge Enhanced Ion Transport in Heterogeneous Polyelectrolyte/Alumina**

**Nanochannel Membranes for High-Performance Osmotic Energy Conversion**

Chen-Wei Chang,<sup>1,+</sup> Chien-Wei Chu,<sup>1,+</sup> Yen-Shao Su,<sup>1,+</sup> Li-Hsien Yeh,<sup>1,\*</sup>

<sup>1</sup>Department of Chemical Engineering, National Taiwan University of Science and  
Technology, Taipei 10607, Taiwan

---

\* Corresponding Author:

Li-Hsien Yeh (Email: [lhych@mail.ntust.edu.tw](mailto:lhych@mail.ntust.edu.tw), TEL: +886-2-27376942);

+ These authors contributed equally to this work

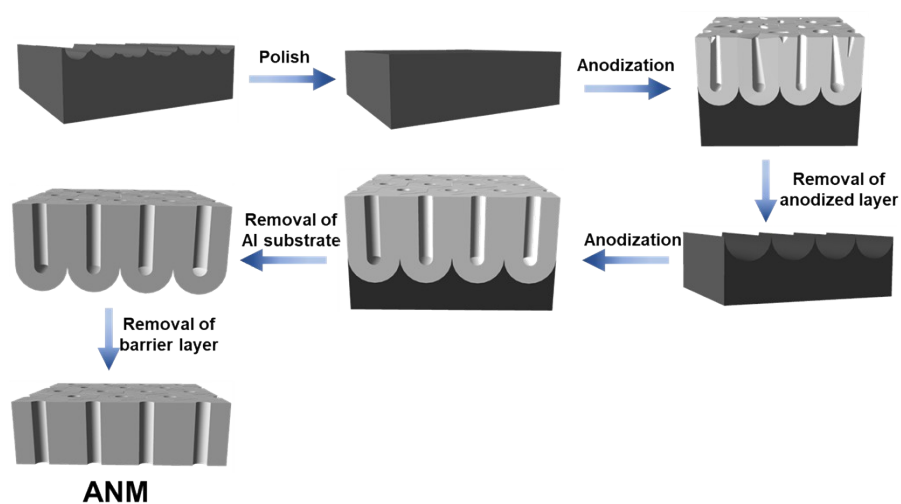

**Fig. S1.** Schematic illustration of the two-step anodization procedure we employed for the fabrication of alumina nanochannel membrane (ANM) with highly ordered straight channels.

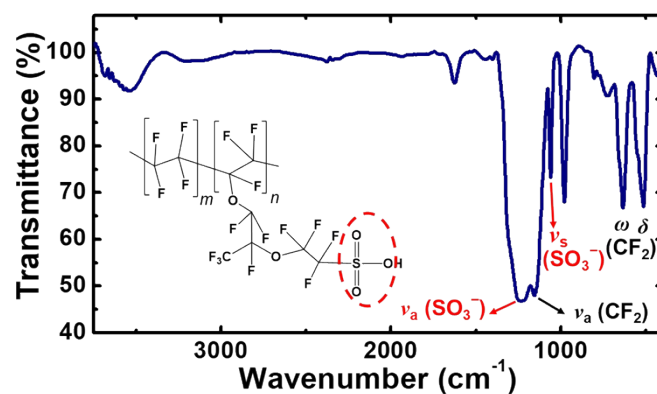

**Fig. S2.** FTIR spectrum of Nafion. The  $\nu_a$  and  $\nu_s$  marked in red are assigned to the asymmetric and symmetric stretching vibrations of the sulfonate groups ( $-\text{SO}_3^-$ ), respectively. The  $\nu_a$  marked in black,  $\omega$ , and  $\delta$  are assigned to F-C-F vibrations of the asymmetric stretching, the out-of-plane wagging, and the in-plane scissoring modes, respectively.

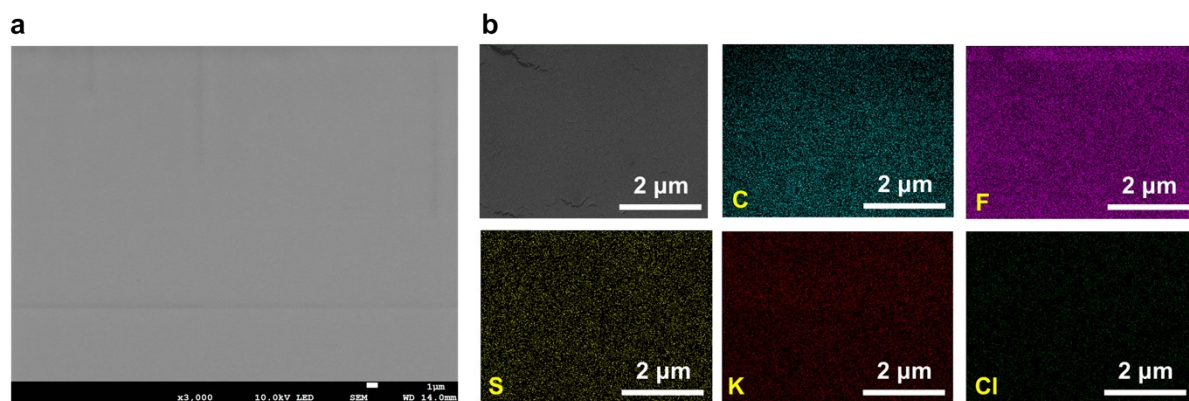

**Fig. S3.** (a) SEM image of the top Nafion layer on a large scale. (b) SEM and EDX elemental mapping characterizations of the Nafion film on a local scale. The images were captured after immersing the membrane in 1 M KCl solution for 30 min. The signal intensity of potassium (red) is apparently stronger than that of chlorine (green), suggesting strong cation-selectivity of Nafion.

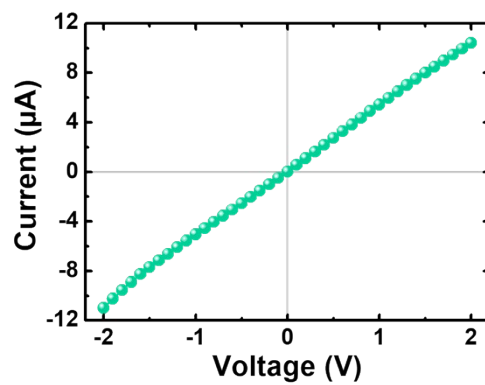

**Fig. S4.** I-V characteristic of the pure Nafion membrane in 10 mM KCl solution. The linear I-V relationship indicates non-rectifying feature of the homogeneous Nafion polyelectrolyte membrane.

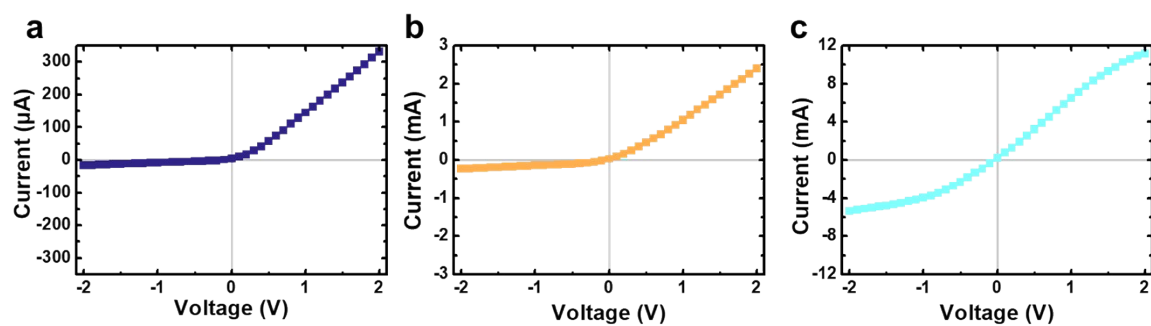

**Fig. S5.** Illustrated experimental I-V curves of the Nafion/ANM recorded in (a) 10 mM, (b) 100 mM and (c) 500 mM KCl solutions.

**Table S1.** The ICR ratio of Nafion/ANM as a function of the KCl concentration.

|                     | KCl concentration (mM) |          |          |         |
|---------------------|------------------------|----------|----------|---------|
|                     | 1                      | 10       | 100      | 500     |
| Rectification ratio | 15.1±2.5               | 18.2±4.3 | 10.3±0.7 | 2.0±0.3 |

**Table S2.** The ICR ratio of Nafion/ANM as a function of the ANM thickness.

|                     | ANM thickness (μm) |          |          |         |
|---------------------|--------------------|----------|----------|---------|
|                     | 15.0               | 38.8     | 62.2     | 85.7    |
| Rectification ratio | 10.3±1.2           | 18.2±4.3 | 12.4±3.0 | 2.9±0.1 |

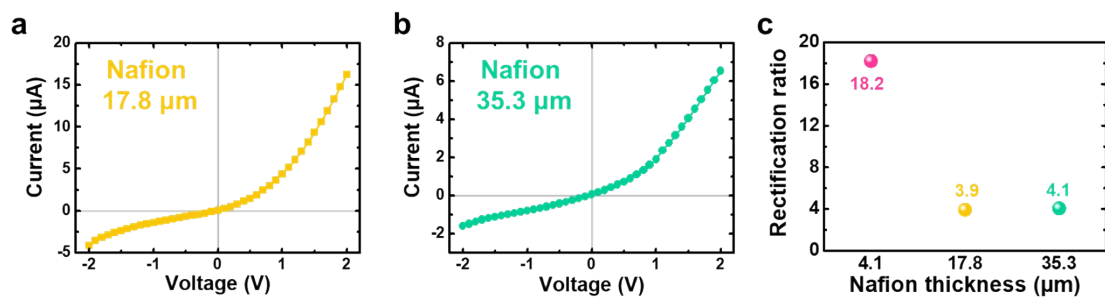

**Fig. S6.** (a,b) I-V curves of the Nafion/ANM with various Nafion thicknesses recorded in 10 mM KCl solution: (a)  $\sim 17.8 \mu\text{m}$ , and (b)  $\sim 35.3 \mu\text{m}$ . (c) Calculated ICR ratio as a function of the Nafion thickness.



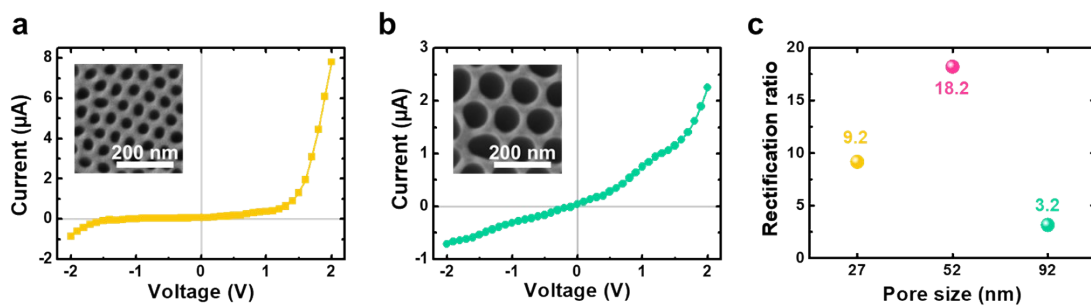

**Fig. S7.** (a,b) I-V curves of the Nafion/ANM with various pore sizes of ANM recorded in 10 mM KCl solution: (a) ~27 nm, and (b) ~92 nm. Insets depict the top-view SEM images of the other two ANMs used in the measurements. (c) Calculated ICR ratio as a function of the ANM pore size.

## Theoretical model

Ion transport property and osmotic energy conversion in the Nafion/ANM system (Fig. S8) considered can be described by the coupled Poisson-Nernst-Planck and Stokes-Brinkman equations with considering the space charge nature originating from the Nafion layer,<sup>1-3</sup>

$$-\nabla^2 \phi = \frac{\sum_{i=1}^2 Fz_i C_i + \Phi \rho_{PE}}{\epsilon_f} \quad (S1)$$

$$\nabla \cdot \mathbf{N}_i = \nabla \cdot \left( \mathbf{u} C_i - D_i \nabla C_i - \frac{Fz_i C_i D_i}{RT} \nabla \phi \right) = 0, \quad i = 1, 2 \quad (S2)$$

$$\mu \nabla^2 \mathbf{u} - \nabla p - \nabla \phi \left( \sum_{i=1}^2 Fz_i C_i \right) - \Phi \frac{\mu}{(\lambda_{PE})^2} \mathbf{u} = \mathbf{0} \quad (S3)$$

$$\nabla \cdot \mathbf{u} = 0 \quad (S4)$$

In the above,  $\rho_{PE}$  is the space charge density of the Nafion layer;  $\phi$ ,  $F$ , and  $R$  are the electrical potential, Faraday constant, and gas constant, respectively;  $\epsilon_f$ ,  $\mathbf{u}$ ,  $p$ ,  $T$ , and  $\mu$  are the permittivity, velocity, pressure, temperature and dynamic viscosity of fluid, respectively;  $z_i$ ,  $C_i$ , and  $D_i$  are the valence, concentration, flux, and diffusivity of the ionic species of  $i$  ( $i=1$  for cations and  $i=2$  for anions);  $\Phi$  is the region function ( $\Phi=1$  represents the region inside the Nafion layer and  $\Phi=0$  represents the region outside the Nafion layer);  $\lambda_{PE}$  is the softness degree of Nafion layer and we assumed  $\lambda_{PE}=1$  nm, consistent with the value of artificial polyelectrolytes (*ca.* 0.1-10 nm).

We assumed the following boundary conditions. (i) The end of the reservoir outside the Nafion layer is applied at a voltage bias  $V$  ( $\phi=V$ ), while the end of the other reservoir is grounded ( $\phi=0$ ). (ii) The ionic concentrations at the ends of two reservoirs reach the bulk values of electrolyte concentration and no external pressure gradient is applied through the system ( $p=0$ ). (iii) The rigid walls of the ANM are non-slip ( $\mathbf{u}=0$ ), ion-impenetrable ( $\mathbf{n} \cdot \mathbf{N}_i=0$ ), and carry a fixed surface charge

density of  $\sigma_s$  ( $-\epsilon_f \mathbf{n} \cdot \nabla \phi = \sigma_s$ ). Here  $\mathbf{n}$  is the unit outer normal vector. (iv) The rigid walls at the upper and lower membrane interfaces are non-slip ( $\mathbf{u} = 0$ ), ion-impenetrable ( $\mathbf{n} \cdot \mathbf{N}_i = 0$ ), and uncharged ( $\mathbf{n} \cdot \nabla \phi = 0$ ). (v) All the electric potential, electric field, ionic concentrations, and flow field are continuous at the Nafion/liquid interfaces. (vi) The symmetric boundary condition is specified along the axis of the Nafion/ANM system.

The ionic current through the system can be calculated by the following equation,

$$I = \int_S \left( \sum_{i=1}^2 F z_i \mathbf{N}_i \right) \cdot \mathbf{n} dS, \quad (\text{S5})$$

where  $S$  denotes either end of the two reservoirs. The other parameters used in the modeling include  $\rho_{PE} = -5 \times 10^7 \text{ C/m}^3$  and  $\sigma_s = 0.08 \text{ C/m}^2$ .

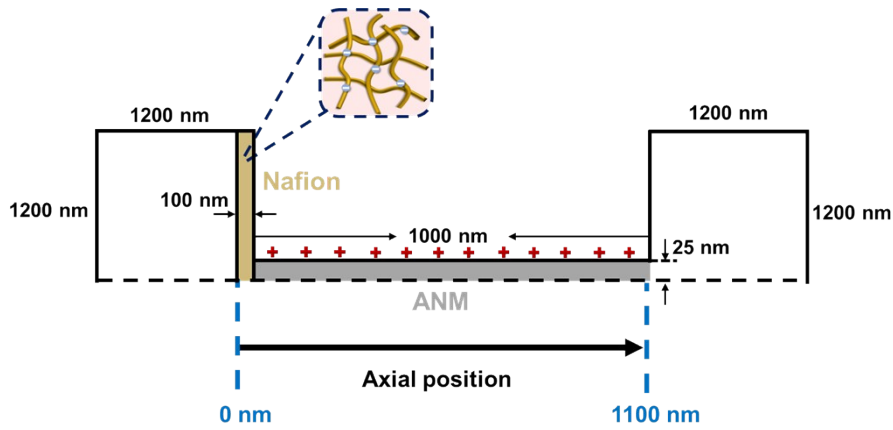

**Fig. S8.** Schematic of the simulated Nafion/ANM system (not to scale). The Nafion thin film is considered as a negatively charged polyelectrolyte layer carrying a space charge density of  $-5 \times 10^7 \text{ C/m}^3$ .

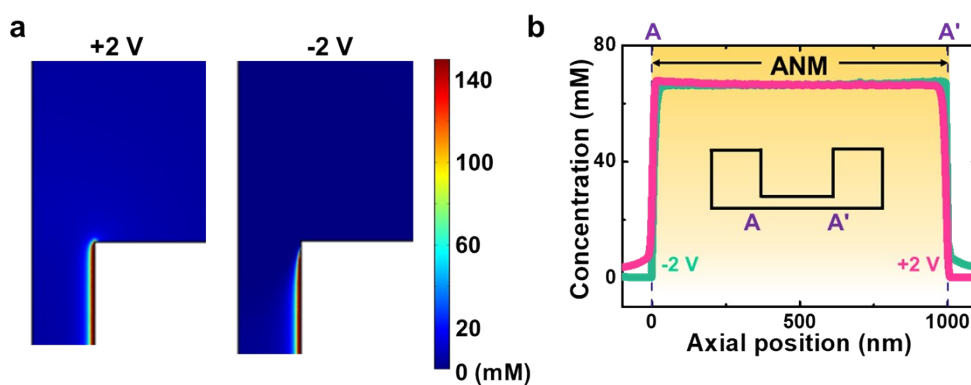

**Fig. S9.** (a) Spatial and (b) axial variations of the total ion concentration ( $K^+$  and  $Cl^-$ ) in the symmetric ANM at the two transmembrane voltages of +2 V and -2 V at 10 mM KCl. The surface charge density on the ANM wall is assumed to be  $0.08 \text{ C/m}^2$ .

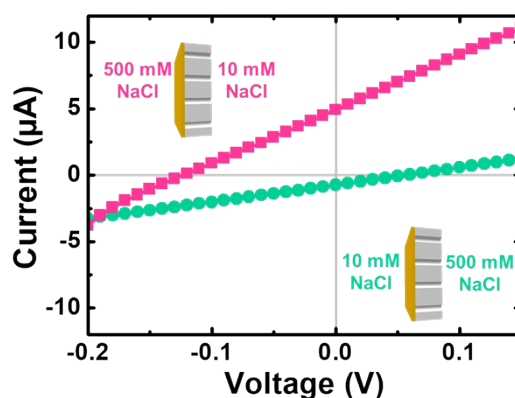

**Fig. S10.** I-V curves of the Nafion/ANM under two opposite directions of a 50-fold NaCl gradient. When the Nafion side is in contact with a higher-concentration solution (pink squares), the measured open-circuit voltage ( $V_{oc}$ ) and closed-circuit current ( $I_{sc}$ ) are *ca.* 121 mV and 4.84  $\mu$ A, respectively, both of which are significantly higher than the values (*i.e.*, 59.6 mV and 0.77  $\mu$ A) at the opposite concentration gradient (green circles). This indicates that higher ion selectivity and faster ion transport can be realized when the Nafion side of heterogeneous membrane faces the higher-concentration solution.

## Electrode calibration

Referring to the equivalent circuit diagram shown in Fig. S11, the measured open-circuit voltage ( $V_{oc}$ ), when a salinity gradient is applied through the Nafion/ANM, consists of two parts including the osmotic potential ( $V_{osm}$ ) and the redox potential ( $V_{red}$ ) that originates from the uneven potential drop at two electrodes in the presence of a salinity gradient, which satisfy the following equation,

$$V_{oc} = V_{red} + V_{osm} \quad (S6)$$

To estimate the pure salinity gradient-driven  $V_{osm}$  and osmotic current ( $I_{osm}$ ), the electrode calibration with  $V_{red}$  should be made, for which the current-voltage curves were recorded by applying the sweeping voltages varying from  $-0.2$  V to  $0.2$  V with a step of  $0.01$  V in the presence and absence of the Nafion/ANM. If no Nafion/ANM, the measured voltage was identified as the  $V_{red}$ . The obtained values of  $V_{red}$  are  $46.7$ ,  $58.6$ , and  $78.3$  mV under 50-, 100-, and 500-fold NaCl gradients, respectively, as shown in Table S3.

## Evaluation of cation selectivity

The cation selectivity of the Nafion/ANM can be estimated by calculation of the cation transference number ( $t^+$ ) according to the following equation,

$$t^+ = \frac{V_{osm}}{2 \left( \frac{RT}{F} \right) \ln \left( \frac{\gamma_H C_H}{\gamma_L C_L} \right)} + 0.5 \quad (S7)$$

where  $\gamma$  is the activity coefficient of salt solutions and the subscripts, H and L, denote the properties of salt solutions in high- and low-concentration reservoirs, respectively. In general,  $t^+=0.5$  represents the non-ion-selective pore membrane and  $t^+=1$  represents the ideally cation-selective membrane.

## Evaluation of energy conversion efficiency

Then the maximum osmotic energy conversion efficiency ( $\eta_{max}$ ) of the Nafion/ANM can be calculated by

$$\eta_{\max} = \frac{(2t^+ - 1)^2}{2} \times 100\% \quad (\text{S8})$$

The values of  $V_{\text{osm}}$ ,  $I_{\text{osm}}$ ,  $t^+$  and  $\eta_{\max}$  of the Nafion/ANM tested under various NaCl gradients were summarized in Table S3.

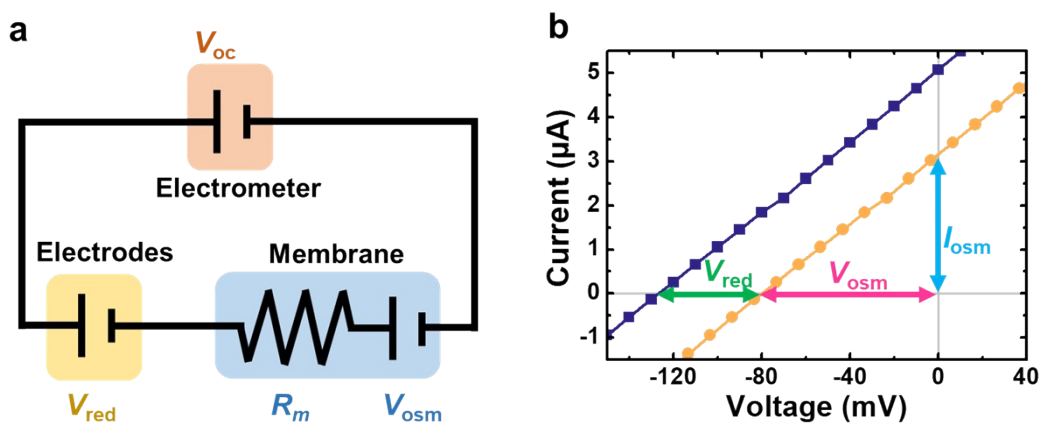

**Fig. S11.** (a) Schematic illustrating the equivalent circuit diagram of the considered osmotic energy conversion system. The measured open-circuit voltage ( $V_{\text{oc}}$ ) includes two parts: redox potential ( $V_{\text{red}}$ ) at the electrodes and the pure salinity gradient-driven osmotic potential ( $V_{\text{osm}}$ ). Only the  $V_{\text{osm}}$  is contributed from the ion-selective membrane subjected to a salinity gradient.  $R_m$  is the electrical resistance of the membrane. (b) Illustrated I-V curves of the Nafion/ANM under a 50-fold NaCl gradient (0.5 M/0.01 M) before (squares with line) and after (spheres with line) the redox potential calibration. The  $V_{\text{osm}}$  and osmotic current ( $I_{\text{osm}}$ ) can be directly read from the intercepts on the voltage and current axes of the calibrated curve, respectively.

**Table S3.** Osmotic power conversion performances tested under various NaCl gradients.

| Nafion/ANM           | Fixed low concentration at 0.01 M |               |               |
|----------------------|-----------------------------------|---------------|---------------|
|                      | 50-fold NaCl                      | 100-fold NaCl | 500-fold NaCl |
| $V_{oc}$ (mV)        | 125                               | 134           | 159           |
| $V_{red}$ (mV)       | 46.7                              | 58.6          | 78.3          |
| $V_{osm}$ (mV)       | 78.3                              | 75.4          | 80.7          |
| $I_{sc}$ ( $\mu$ A)  | 5.01                              | 7.13          | 15.3          |
| $I_{osm}$ ( $\mu$ A) | 3.04                              | 3.64          | 7.54          |
| $t^+$                | 0.933                             | 0.855         | 0.783         |
| $\eta_{max}$ (%)     | 37.5                              | 25.3          | 16.0          |



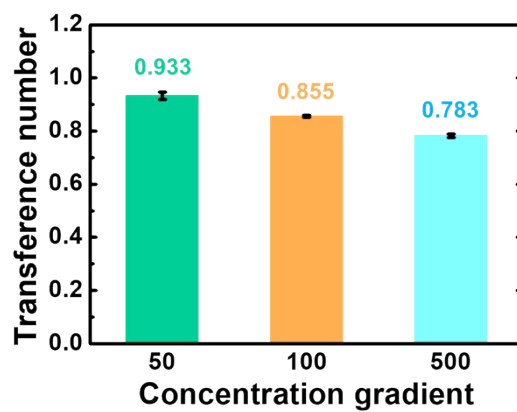

**Fig. S12.** Cation transference number ( $t^+$ ) of the Nafion/ANM tested at various NaCl gradients. The  $t^+$  values under 50-, 100-, and 500-fold concentration gradients are *ca.* 0.933, 0.855, and 0.783, respectively.

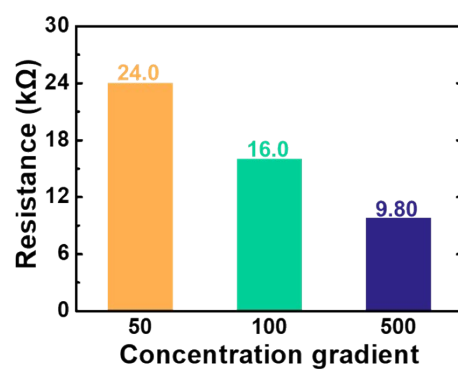

**Fig. S13.** The external resistance at which the Nafion/ANM can achieve the maximum power output.

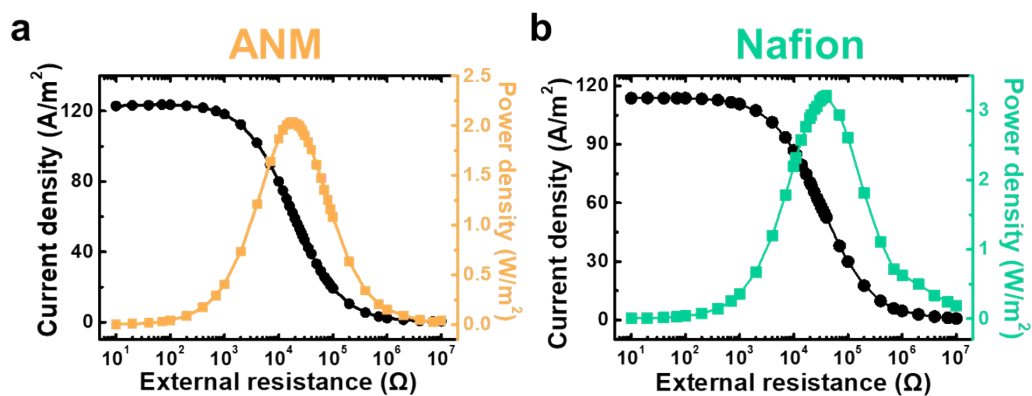

**Fig. S14.** The osmotic power conversion performance generated by (a) the ANM and (b) pure Nafion membrane in 0.5 M/0.01 M NaCl gradient. The averaged maximum power densities achieved by the ANM and pure Nafion membrane are *ca.* 2.04 and 3.18  $W/m^2$ , respectively.

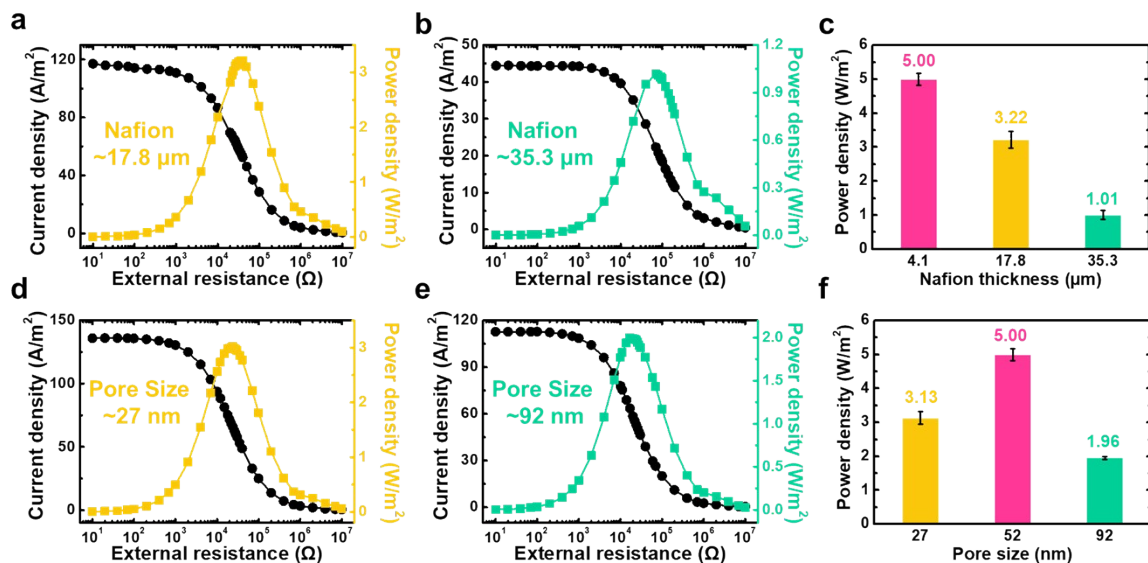

**Fig. S15.** (a-c) Effect of the Nafion thickness on the osmotic power conversion performance of the Nafion/ANM with a Nafion thickness of (a) ~17.8 μm and (b) ~35.3 μm in 0.5 M/0.01 M NaCl gradient. (c) The achieved power density as a function of the Nafion thickness. (d-e) Effect of the pore size of ANM on the osmotic power conversion performance of the hybrid Nafion/ANM by using an ANM with pore diameter of about (d) 27 nm and (e) 92 nm in 0.5 M/0.01 M NaCl gradient. (f) The achieved power density as a function of the ANM pore size.

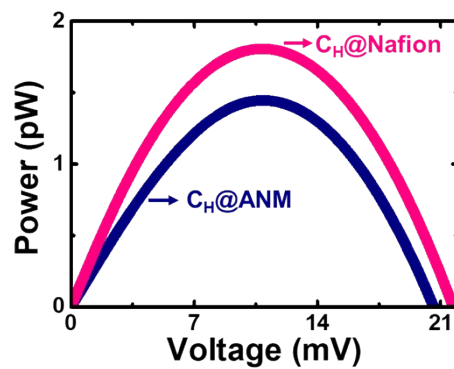

**Fig. S16.** Simulated P-V curves for the Nafion/ANM under two configurations of a 500-fold salinity gradient. Pink (blue) curve indicates that the higher concentration is set at the Nafion (ANM) side.

**Table S4.** Comparison of the osmotic energy conversion efficiency and power density achieved by the present Nafion/ANM and the state-of-the-art ion-selective membranes reported in the literatures at the same 0.5 M/0.01 M NaCl gradient.

| Membrane                    | Efficiency (%) | $P_{\max}$ (W/m <sup>2</sup> ) | Reference |
|-----------------------------|----------------|--------------------------------|-----------|
| PVMs                        | -              | 4.1                            | 4         |
| UiO-66-NH <sub>2</sub> @ANM | -              | 2.96                           | 5         |
| SPEEK/AAO                   | -              | 4.8                            | 6         |
| BCP/AAO                     | -              | 2.94                           | 7         |
| PSS/MOF/AAO                 | -              | 2.87                           | 8         |
| MesoC/AAO                   | 37.3           | 3.46                           | 9         |
| SNF/AAO                     | 17.2           | 2.86                           | 10        |
| PES-Py/PAEK-HS              | 35.7           | 2.66                           | 11        |
| MXene/Kevlar                | 35.0           | 3.7                            | 12        |
| GO/SNF/GO                   | 27.2           | 5.07                           | 13        |
| MoS <sub>2</sub> /CNF       | 32.0           | 5.2                            | 14        |
| Nafion/ANM                  | 37.5           | 5.13                           | This work |

**Table S5.** Comparison of the power density outputted by the present Nafion/ANM and the reported ion-selective membrane in hypersaline environment (5 M/0.01 M NaCl gradient).

| Membrane                 | Thickness ( $\mu\text{m}$ ) | $P_{\text{max}}$ ( $\text{W}/\text{m}^2$ ) | Reference |
|--------------------------|-----------------------------|--------------------------------------------|-----------|
| PES-Py/PAEK-HS           | 21.0                        | 5.1                                        | 11        |
| GO/SNF/GO                | 10.7                        | 16.2                                       | 13        |
| MoS <sub>2</sub> /CNF    | 4.0                         | 15.6                                       | 14        |
| GO/CNFs                  | 9.0                         | 13.3                                       | 15        |
| CS/SA                    | 30                          | 19.4                                       | 16        |
| MXene/PS- <i>b</i> -P2VP | 1.2                         | 12.4                                       | 17        |
| SPEEK                    | 27.0                        | 20.2                                       | 18        |
| HEMAP                    | 24.0                        | 19.6                                       | 19        |
| SF                       | 0.1                         | 21.7                                       | 20        |
| SPEEK/AAO                | 80                          | 12.5                                       | 6         |
| Nafion/ANM               | 21.6                        | 22.1                                       | This work |

## References

1. L. H. Yeh, M. Zhang, S. Qian, J. P. Hsu and S. Tseng, *J. Phys. Chem. C*, 2012, **116**, 8672-8677.
2. C. Y. Lin, J. P. Hsu and L. H. Yeh, *Sens. Actuator B-Chem.*, 2018, **258**, 1223-1229.
3. Z. Zeng, Y. Ai and S. Qian, *Phys. Chem. Chem. Phys.*, 2014, **16**, 2465-2474.
4. L. Cao, H. Wu, C. Y. Fan, Z. M. Zhang, B. B. Shi, P. F. Yang, M. Qiu, N. A. Khan and Z. Y. Jiang, *J. Mater. Chem. A*, 2021, **9**, 14576-14581.
5. Y. C. Liu, L. H. Yeh, M. J. Zheng and K. C. W. Wu, *Sci. Adv.*, 2021, **7**, eabe9924.
6. S. H. Hou, Q. R. Zhang, Z. Zhang, X. Y. Kong, B. Z. Lu, L. P. Wen and L. Jiang, *Nano Energy*, 2021, **79**, 105509.
7. X. Sui, Z. Zhang, C. Li, L. C. Gao, Y. Zhao, L. J. Yang, L. P. Wen and L. Jiang, *ACS Appl. Mater. Interfaces*, 2019, **11**, 23815-23821.
8. R. R. Li, J. Q. Jiang, Q. Q. Liu, Z. Q. Xie and J. Zhai, *Nano Energy*, 2018, **53**, 643-649.
9. J. Gao, W. Guo, D. Feng, H. T. Wang, D. Y. Zhao and L. Jiang, *J. Am. Chem. Soc.*, 2014, **136**, 12265-12272.
10. W. W. Xin, Z. Zhang, X. D. Huang, Y. H. Hu, T. Zhou, C. C. Zhu, X. Y. Kong, L. Jiang and L. P. Wen, *Nat. Commun.*, 2019, **10**, 3876.
11. X. B. Zhu, J. R. Hao, B. Bao, Y. H. Zhou, H. B. Zhang, J. H. Pang, Z. H. Jiang and L. Jiang, *Sci. Adv.*, 2018, **4**, eaau1665.
12. Z. Zhang, S. Yang, P. P. Zhang, J. Zhang, G. B. Chen and X. L. Feng, *Nat. Commun.*, 2019, **10**, 2920.
13. W. W. Xin, H. Y. Xiao, X. Y. Kong, J. J. Chen, L. S. Yang, B. Niu, Y. C. Qian, Y. F. Teng, L. Jiang and L. P. Wen, *ACS Nano*, 2020, **14**, 9701-9710.
14. C. C. Zhu, P. Liu, B. Niu, Y. N. Liu, W. W. Xin, W. P. Chen, X. Y. Kong, Z. Zhang, L. Jiang and L. P. Wen, *J. Am. Chem. Soc.*, 2021, **143**, 1932-1940.
15. Y. D. Wu, W. W. Xin, X. Y. Kong, J. J. Chen, Y. C. Qian, Y. Sun, X. L. Zhao, W. P. Chen, L. Jiang and L. P. Wen, *Materials Horizons*, 2020, **7**, 2702-2709.
16. G. S. Bian, N. Pan, Z. H. Luan, X. Sui, W. X. Fan, Y. Z. Xia, K. Y. Sui and L. Jiang, *Angew. Chem.-Int. Edit.*, 2021, **60**, 20294-20300.
17. X. Lin, P. Liu, W. Xin, Y. Teng, J. Chen, Y. Wu, Y. Zhao, X. Y. Kong, L. Jiang and L. P. Wen, *Adv. Funct. Mater.*, 2021, **31**, 2105013.
18. Y. Y. Zhao, J. Wang, X. Y. Kong, W. W. Xin, T. Zhou, Y. C. Qian, L. S. Yang, J. H. Pang, L. Jiang and L. P. Wen, *Natl. Sci. Rev.*, 2020, **7**, 1349-1359.
19. W. P. Chen, Q. Wang, J. J. Chen, Q. R.



- Zhang, X. L. Zhao, Y. C. Qian, C. C. Zhu, L. S. Yang, Y. Y. Zhao, X. Y. Kong, B. Z. Lu, L. Jiang and L. P. Wen, *Nano Lett.*, 2020, **20**, 5705-5713.
20. J. J. Chen, W. W. Xin, X. Y. Kong, Y. C. Qian, X. L. Zhao, W. P. Chen, Y. Sun, Y. D. Wu, L. Jian and L. P. Wen, *ACS Energy Lett.*, 2020, **5**, 742-748.
